# Supplementary material for: Azelaic acid-integrated therapeutic deep eutectic systems: overcoming solubility and permeability barriers for enhanced transdermal drug delivery
Source: Royal Society of Chemistry journal article supplement (doi:10.1039/d5ra09988a), 2026-04-13
Supplement: d5ra09988a1.pdf [file d5ra09988a1.pdf]

## Azelaic Acid-Integrated Therapeutic Deep Eutectic Systems: Overcoming Solubility and Permeability Barriers for Enhanced Transdermal Drug Delivery

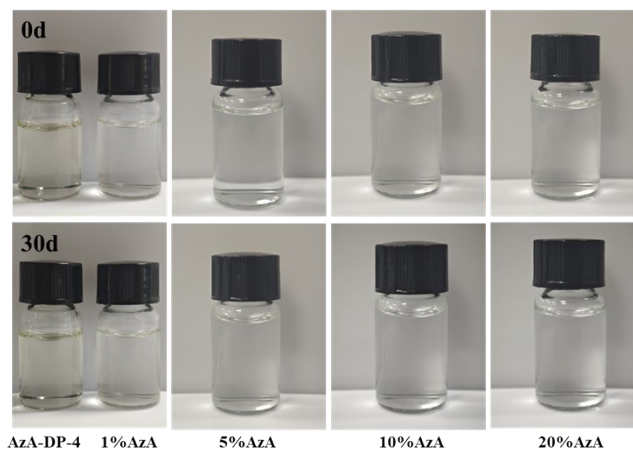

S1 stability of AzA-DP-4.

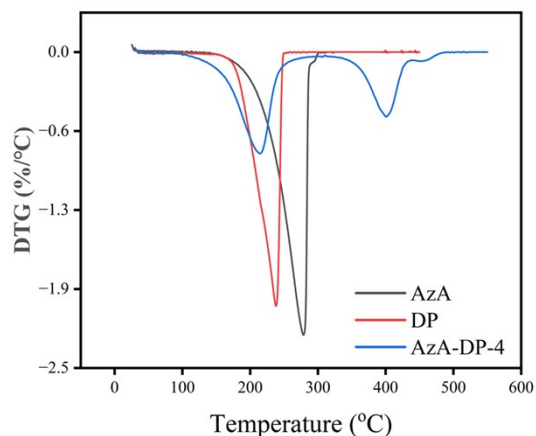

S2 Characterization of AzA, DP and THEDES DTG

### S3 Key thermal degradation parameters of AzA, DP and AzA-DP-4 system

| Sample          | Degradation Stage       | $\Delta m$ /% | $T_{\text{onset}}$ /°C | $T_{\text{max}}$ /°C | $T_{\text{end}}$ /°C |
|-----------------|-------------------------|---------------|------------------------|----------------------|----------------------|
| DP              | Stage 1                 | 99.8          | 130                    | 230                  | 280                  |
| AzA             | Stage 1                 | 99.7          | 250                    | 280                  | 350                  |
| AzA-DP-4 THEDES | Stage 1 (DP-dominated)  | 68.6          | 132                    | 220                  | 300                  |
| AzA-DP-4 THEDES | Stage 2 (AzA-dominated) | 31.4          | 300                    | 390                  | 480                  |

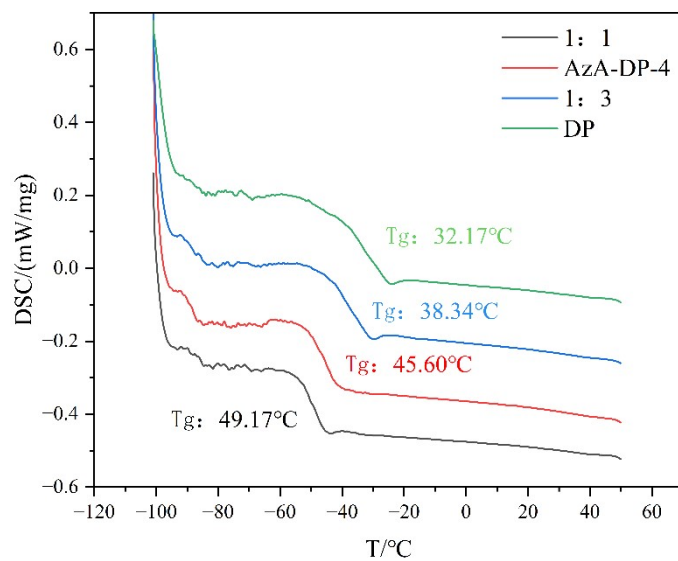

S4 Characterization of 1: 1, AzA-DP-4, 1:3 and DP DSC

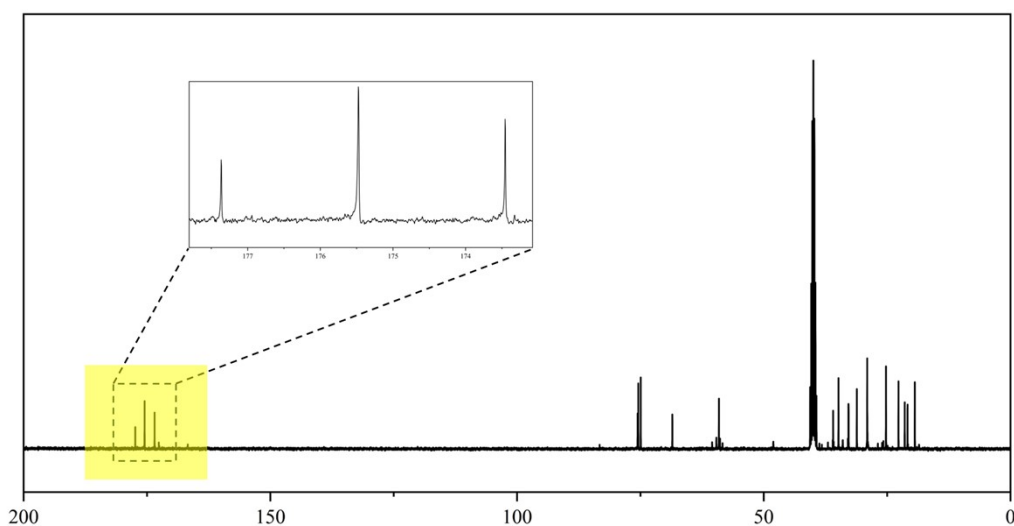

S5 The  $^{13}\text{C}$  NMR of AzA-DP-4

S6 Comparison of measured Tg and ideal mixing Tg of AzA-DP systems

| AzA:DP<br>molar ratio  | Measured Tg<br>(°C) | Measured Tg<br>(K) | Ideal Tg (Fox<br>equation, K) | Deviation (K,<br>Measured - Ideal) |
|------------------------|---------------------|--------------------|-------------------------------|------------------------------------|
| 0:1 (pure DP)          | -32.17              | 240.98             | 240.98                        | 0.00                               |
| 1:3                    | -38.34              | 234.81             | 233.12                        | +1.69                              |
| 1:2 (optimal<br>ratio) | -45.60              | 227.55             | 228.90                        | -1.35                              |

| AzA:DP molar ratio | Measured Tg (°C) | Measured Tg (K) | Ideal Tg (Fox equation, K) | Deviation (K, Measured - Ideal) |
|--------------------|------------------|-----------------|----------------------------|---------------------------------|
| 1:1                | -49.17           | 223.98          | 224.87                     | -0.89                           |

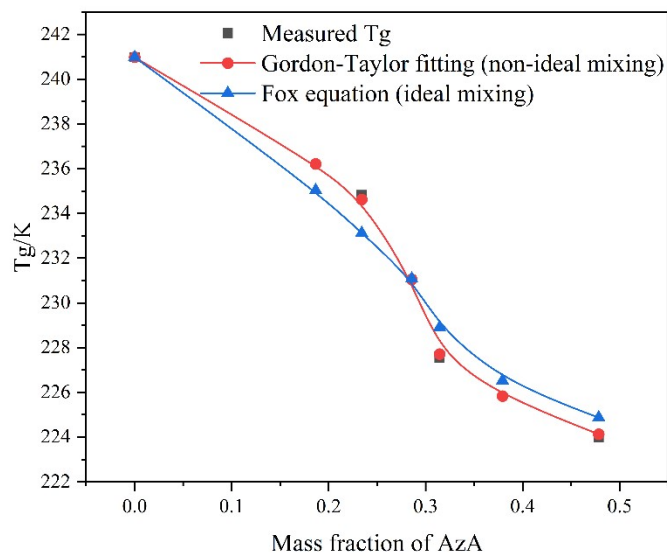

S7 Composition-dependent Tg profile of AzA-DP systems: measured Tg (black), ideal mixing line (Fox equation, blue), and Gordon-Taylor fitting curve (red).

#### S8. Core parameters of Gordon-Taylor model fitting

| Parameter                      | Value               | Physical Meaning                                                                                    |
|--------------------------------|---------------------|-----------------------------------------------------------------------------------------------------|
| Fixed Tg,DP                    | 240.98 K (-32.17°C) | Experimentally measured Tg of pure DP                                                               |
| Fitted Tg,AzA                  | 206.5 K (-66.65°C)  | Tg of amorphous AzA obtained via fitting                                                            |
| Interaction parameter k        | 0.72                | Significant deviation from 1 (ideal mixing), confirming strong non-ideal intermolecular interaction |
| Goodness of fit R <sup>2</sup> | 0.9992              | Excellent fitting effect, reliable modeling results                                                 |

#### S9. Results of skin irritation test

| Application | Number | Skin irritation reaction score |
|-------------|--------|--------------------------------|
|-------------|--------|--------------------------------|

| Number of days                         | of animals (piece) | Sample group |       |             | Control group |       |             |
|----------------------------------------|--------------------|--------------|-------|-------------|---------------|-------|-------------|
|                                        |                    | erythema     | edema | Total score | erythema      | edema | Total score |
| 1                                      | 4                  | 0            | 0     | 0           | 0             | 0     | 0           |
| 2                                      | 4                  | 0            | 0     | 0           | 0             | 0     | 0           |
| 3                                      | 4                  | 0            | 0     | 0           | 0             | 0     | 0           |
| 4                                      | 4                  | 0            | 0     | 0           | 0             | 0     | 0           |
| 5                                      | 4                  | 0            | 0     | 0           | 0             | 0     | 0           |
| 6                                      | 4                  | 0            | 0     | 0           | 0             | 0     | 0           |
| 7                                      | 4                  | 0            | 0     | 0           | 0             | 0     | 0           |
| 8                                      | 4                  | 0            | 0     | 0           | 0             | 0     | 0           |
| 9                                      | 4                  | 0            | 0     | 0           | 0             | 0     | 0           |
| 10                                     | 4                  | 0            | 0     | 0           | 0             | 0     | 0           |
| 11                                     | 4                  | 0            | 0     | 0           | 0             | 0     | 0           |
| 12                                     | 4                  | 0            | 0     | 0           | 0             | 0     | 0           |
| 13                                     | 4                  | 0            | 0     | 0           | 0             | 0     | 0           |
| 14                                     | 4                  | 0            | 0     | 0           | 0             | 0     | 0           |
| Average points per animal over 14 days |                    | 0            | 0     | 0           | 0             | 0     | 0           |
| Average points per animal per day      |                    | 0            | 0     | 0           | 0             | 0     | 0           |

S10. Results of Acute Eye Irritation Test

| Animal Number       | part        | Eye irritation response score |          |         |          |         |          |         |          |
|---------------------|-------------|-------------------------------|----------|---------|----------|---------|----------|---------|----------|
|                     |             | 1 h                           |          | 24 h    |          | 48 h    |          | 72 h    |          |
|                     |             | sampl e                       | contro l | sampl e | contro l | sampl e | contro l | sampl e | contro l |
| 1                   | cornea      | 0                             | 0        | 0       | 0        | 0       | 0        | 0       | 0        |
|                     | iris        | 0                             | 0        | 0       | 0        | 0       | 0        | 0       | 0        |
|                     | conjunctiva | 0                             | 0        | 0       | 0        | 0       | 0        | 0       | 0        |
| 2                   | cornea      | 0                             | 0        | 0       | 0        | 0       | 0        | 0       | 0        |
|                     | iris        | 0                             | 0        | 0       | 0        | 0       | 0        | 0       | 0        |
|                     | conjunctiva | 0                             | 0        | 0       | 0        | 0       | 0        | 0       | 0        |
| 3                   | cornea      | 0                             | 0        | 0       | 0        | 0       | 0        | 0       | 0        |
|                     | iris        | 0                             | 0        | 0       | 0        | 0       | 0        | 0       | 0        |
|                     | conjunctiva | 0                             | 0        | 0       | 0        | 0       | 0        | 0       | 0        |
| Integral mean value | cornea      | 0                             | 0        | 0       | 0        | 0       | 0        | 0       | 0        |
|                     | iris        | 0                             | 0        | 0       | 0        | 0       | 0        | 0       | 0        |
|                     | conjunctiva | 0                             | 0        | 0       | 0        | 0       | 0        | 0       | 0        |

S11. Skin conditions of volunteers in different time periods

| Group      | Time  | The number of volunteers with different skin scores |                |                |                |                |
|------------|-------|-----------------------------------------------------|----------------|----------------|----------------|----------------|
|            |       | 0 <sup>a</sup>                                      | 1 <sup>b</sup> | 2 <sup>c</sup> | 3 <sup>d</sup> | 4 <sup>e</sup> |
| Control    | 0.5 h | 20                                                  | 0              | 0              | 0              | 0              |
|            | 24 h  | 20                                                  | 0              | 0              | 0              | 0              |
|            | 48 h  | 20                                                  | 0              | 0              | 0              | 0              |
| Experiment | 0.5 h | 20                                                  | 0              | 0              | 0              | 0              |
|            | 24 h  | 20                                                  | 0              | 0              | 0              | 0              |
|            | 48 h  | 20                                                  | 0              | 0              | 0              | 0              |

(a) Negative; (b) Suspected reaction, with only faint spots; (c) Weakly positive reaction, with erythema, infiltration, edema, and possibly papules; (d) Strongly positive reaction, with erythema, infiltration, edema, papules, herpes, which may exceed the test area; (e) Strongly positive reaction, with obvious erythema, severe infiltration, edema, confluent measles, exceeding the test area.

S12 Information on the action sites of azelaic acid and TLR4

| Types of acting forces  | Amino acid site information<br>(residue) | Amino acid name |
|-------------------------|------------------------------------------|-----------------|
| Hydrogen Bonds          | 143A                                     | ASN             |
|                         | 148A                                     | HIS             |
| Hydrophobic Interaction | 170A                                     | TYR             |
| Salt Bridges            | 148A                                     | HIS             |

S13. Information on the interaction sites between NADES (AzA-DP-4) and TLR4

| Types of forces         | Amino acid site information<br>(residue) | Amino acid name |
|-------------------------|------------------------------------------|-----------------|
| Hydrogen Bonds          | 46A                                      | TYR             |
|                         | 47A                                      | LYS             |
|                         | 48A                                      | ILE             |
|                         | 50A                                      | ASP             |
|                         | 71A                                      | SER             |
|                         | 72A                                      | TYR             |
|                         | 76A                                      | SER             |
| Hydrophobic Interaction | 45A                                      | PHE             |
|                         | 46A                                      | TYR             |
|                         | 47A                                      | LYS             |
|                         | 49A                                      | PRO             |
| Salt Bridges            | 50A                                      | ASP             |
|                         | 47A                                      | LYS             |
